# Supplementary material for: Spatiotemporal Characteristics of the Surface Urban Heat Island and Its Driving Factors Based on Local Climate Zones and Population in Beijing, China
Source: MDPI journal article supplement (doi:10.3390/atmos12101271), 2021-09-29
Supplement: s1 [file s1]

Archive with 1 entries (1 files):
- atmosphere-1372032-supplementary.pdf
