# Supplementary material for: Spatiotemporal Characteristics of the Surface Urban Heat Island and Its Driving Factors Based on Local Climate Zones and Population in Beijing, China
Source: MDPI journal article supplement (doi:10.3390/atmos12101271), 2021-09-29
Supplement: s1 [file s1 › atmosphere-1372032-supplementary.pdf]

# Supplementary Materials: Spatiotemporal Characteristics of the Surface Urban Heat Island and Its Driving Factors Based on Local Climate Zones and Population in Beijing, China

Yatong Zhang <sup>1,2</sup>, Delong Li <sup>1,2</sup>, Laibao Liu <sup>1,2</sup>, Ze Liang <sup>1,2</sup>, Jiashu Shen <sup>1,2</sup>, Feili Wei <sup>1,2</sup> and Shuangcheng Li <sup>1,2,\*</sup>

**Table S1.** Local climate zones scheme (Stewart and Oke, 2012).

| Built types                                                                         | Definition                                                                                                                                                                       | Land cover types                                                                    | Definition                                                                                                                               |
|-------------------------------------------------------------------------------------|----------------------------------------------------------------------------------------------------------------------------------------------------------------------------------|-------------------------------------------------------------------------------------|------------------------------------------------------------------------------------------------------------------------------------------|
| <b>LCZ 1 Compact high-rise</b>                                                      | Dense mix of tall buildings to tens of stories. Few or no trees. Land cover mostly paved. Concrete, steel, stone, and glass construction materials.                              | <b>LCZ A Dense trees</b>                                                            | Heavily wooded landscape of deciduous and/or evergreen trees.                                                                            |
| 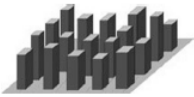   |                                                                                                                                                                                  | 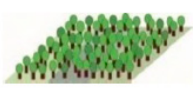   | Land cover mostly pervious (low plants). Zone function is natural forest, tree cultivation, or urban park.                               |
| <b>LCZ 2 Compact midrise</b>                                                        | Dense mix of midrise buildings (3–9 stories). Few or no trees. Land cover mostly paved. Stone, brick, tile, and concrete construction materials.                                 | <b>LCZ B Scattered trees</b>                                                        | Lightly wooded landscape of deciduous and/or evergreen trees.                                                                            |
| 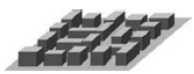 |                                                                                                                                                                                  | 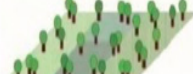 | Land cover mostly pervious (low plants). Zone function is natural forest, tree cultivation, or urban park.                               |
| <b>LCZ 3 Compact low-rise</b>                                                       | Dense mix of low-rise buildings (1–3 stories). Few or no trees. Land cover mostly paved. Stone, brick, tile, and concrete construction materials.                                | <b>LCZ C Bush, scrub</b>                                                            | Open arrangement of bushes, shrubs, and short, woody trees.                                                                              |
| 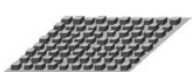 |                                                                                                                                                                                  | 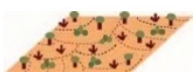 | Land cover mostly pervious (bare soil or sand). Zone function is natural scrubland or agriculture.                                       |
| <b>LCZ 4 Open high-rise</b>                                                         | Open arrangement of tall buildings to tens of stories. Abundance of pervious land cover (low plants, scattered trees). Concrete, steel, stone, and glass construction materials. | <b>LCZ D Low plants</b>                                                             | Featureless landscape of grass or herbaceous plants/crops.                                                                               |
| 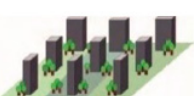 |                                                                                                                                                                                  | 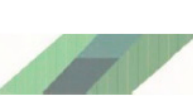 | Few or no trees. Zone function is natural grassland, agriculture, or urban park                                                          |
| <b>LCZ 5 Open midrise</b>                                                           | Open arrangement of midrise buildings (3–9 stories). Abundance of pervious land cover (low plants, scattered trees). Concrete,                                                   | <b>LCZ E Bare rock or paved</b>                                                     | Featureless landscape of rock or paved cover. Few or no trees or plants. Zone function is natural desert (rock) or urban transportation. |
| 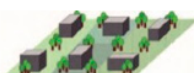 |                                                                                                                                                                                  | 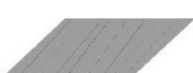 |                                                                                                                                          |

|                                                                                     |                                                                                                                                                                                      |                                                                                   |                                                                                                                         |
|-------------------------------------------------------------------------------------|--------------------------------------------------------------------------------------------------------------------------------------------------------------------------------------|-----------------------------------------------------------------------------------|-------------------------------------------------------------------------------------------------------------------------|
|                                                                                     | steel, stone, and glass construction materials.                                                                                                                                      |                                                                                   |                                                                                                                         |
| <b>LCZ 6 Open low-rise</b>                                                          | Open arrangement of low-rise buildings (1–3 stories). Abundance of pervious land cover (low plants, scattered trees). Wood, brick, stone, tile, and concrete construction materials. | <b>LCZ F Bare soil or sand</b>                                                    | Featureless landscape of soil or sand cover. Few or no trees or plants. Zone function is natural desert or agriculture. |
| 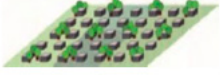   |                                                                                                                                                                                      | 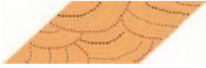 |                                                                                                                         |
| <b>LCZ 7 Lightweight low-rise</b>                                                   | Dense mix of single-story buildings. Few or no trees. Land cover mostly hard-packed. Lightweight construction materials (e.g., wood, thatch, corrugated metal).                      | <b>LCZ G Water</b>                                                                | Large, open water bodies such as seas and lakes, or small bodies such as rivers, reservoirs, and lagoons.               |
| 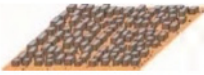   |                                                                                                                                                                                      | 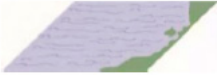 |                                                                                                                         |
| <b>LCZ 8 Large low-rise</b>                                                         | Open arrangement of large low-rise buildings (1–3 stories). Few or no trees. Land cover mostly paved. Steel, concrete, metal, and stone construction materials.                      |                                                                                   |                                                                                                                         |
| 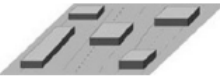 |                                                                                                                                                                                      |                                                                                   |                                                                                                                         |
| <b>LCZ 9 Sparsely built</b>                                                         | Sparse arrangement of small or medium-sized buildings in a natural setting. Abundance of pervious land cover (low plants, scattered trees).                                          |                                                                                   |                                                                                                                         |
| 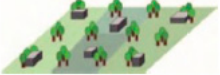 |                                                                                                                                                                                      |                                                                                   |                                                                                                                         |
| <b>LCZ 10 Heavy industry</b>                                                        | Low-rise and midrise industrial structures (towers, tanks, stacks). Few or no trees. Land cover mostly paved or hard-packed. Metal, steel, and concrete construction materials.      |                                                                                   |                                                                                                                         |
| 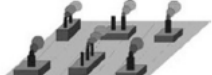 |                                                                                                                                                                                      |                                                                                   |                                                                                                                         |

**Table S2.** Regression coefficients for TM\ETM+ and TIRS for different temperature ranges.

| Sensor  | Temperature ranges (°C) | <i>a</i> | <i>b</i> |
|---------|-------------------------|----------|----------|
| TM\ETM+ | 0~30                    | -60.3263 | 0.43436  |
|         | 20~50                   | -67.9542 | 0.45987  |

|      |       |           |          |
|------|-------|-----------|----------|
| TIRS | 0~70  | -67.35535 | 0.458608 |
|      | 0~30  | -59.139   | 0.421    |
|      | 0~40  | -60.919   | 0.428    |
|      | 10~40 | -62.806   | 0.434    |
|      | 10~50 | -64.608   | 0.440    |

### Estimation of emissivity( $\epsilon$ )

The emissivity estimation method proposed by Qin et al. (2004) is used in this research. In this method, the land surface is considered being composed by land cover of water, urban surface and nature surface. The emissivity of natural surface is estimated by Equation S1.

$$\epsilon = \begin{cases} P_v R_v \epsilon_v + (1 - P_v) R_s \epsilon_s + d\epsilon, & \epsilon < \epsilon_v \\ \epsilon_v, & \epsilon \geq \epsilon_v \end{cases} \quad (S1)$$

where  $R_v$  and  $R_s$  are the temperature ratio of vegetation and soil, respectively;  $P_v$  is the vegetation fraction calculated by Equation S2 (Carlson and Ripley, 1997);  $d\epsilon$  is the contribution of interaction between vegetation and soil on emissivity calculated by formula S3 (Sobrino et al., 2004);  $\epsilon_v$  and  $\epsilon_s$  are emissivity of vegetation and soil, respectively.

$$P_v = \begin{cases} 0, & NDVI < NDVI_s \\ \left( \frac{NDVI - NDVI_s}{NDVI_v - NDVI_s} \right)^2, & NDVI_s \leq NDVI \leq NDVI_v \\ 1, & NDVI > NDVI_v \end{cases} \quad (S2)$$

$$d\epsilon = \begin{cases} 0.0038 P_v, & P_v \leq 0.5 \\ 0.0038(1 - P_v), & P_v > 0.5 \\ 0.0019, & P_v = 0.5 \end{cases} \quad (S3)$$

where  $NDVI_v$  and  $NDVI_s$  are the the Normalized Difference Vegetation Index value of vegetation and soil, respectively. Moreover, the emissivity of urban area was estimated by Equation S4.

$$\epsilon = P_v R_v \epsilon_v + (1 - P_v) R_m \epsilon_m + d\epsilon \quad (S4)$$

where,  $R_m$  and  $\epsilon_m$  are the temperature ratio and emissivity of the built-up surface, respectively.

The  $R_v$ ,  $R_s$  and  $R_m$  are calculated by Equation S5–S7 and the value of  $\epsilon_v$ ,  $\epsilon_s$ ,  $\epsilon_m$  and  $\epsilon_w$  (the emissivity of water) are listed in Table S3.

$$R_v = 0.9332 + 0.0585 P_v \quad (S5)$$

$$R_s = 0.9902 + 0.1068 P_v \quad (S6)$$

$$R_m = 0.9886 + 0.1287 P_v \quad (S7)$$

**Table S3.** Emissivity of typical land cover in thermal infrared bands of different sensors.

| $\epsilon_w$ | $\epsilon_v$ | $\epsilon_s$ | $\epsilon_m$ |
|--------------|--------------|--------------|--------------|
|--------------|--------------|--------------|--------------|

|                |         |         |         |          |
|----------------|---------|---------|---------|----------|
| TM\ETM+ band 6 | 0.995   | 0.986   | 0.97215 | 0.970    |
| TIRS band 10   | 0.99683 | 0.98672 | 0.96767 | 0.964885 |

From Qin et al. (2004) and Song et al. (2015)

#### Estimation of atmospheric transmittance ( $\tau$ )

Qin et al. (2003) and Rozenstein et al. (2014) proposed the estimation method of atmospheric transmittance of thermal infrared band (band 6 of TM/ETM+ and band 10 of TIRS, Table S4 and Table S5). According to the location of study area and the observation time of Landsat images, the estimation equations was applied with profile condition of high air temperature and water vapor content range of 1.6–3.0 g·cm<sup>-2</sup> (for TM/ETM+ images) and with profile condition of Mid-Latitude Summer (for TIRS ).

**Table S4.** Estimation of the atmospheric transmittance for TM/ETM+.

| Profiles             | water vapor ( $\omega$ ) (g·cm <sup>-2</sup> ) | Estimation Equation             |
|----------------------|------------------------------------------------|---------------------------------|
| High air temperature | 0.4~1.6                                        | $\tau=0.974290 - 0.08007\omega$ |
|                      | 1.6~3.0                                        | $\tau=1.031412 - 0.11536\omega$ |
| Low air temperature  | 0.4~1.6                                        | $\tau=0.982007 - 0.09611\omega$ |
|                      | 1.6~3.0                                        | $\tau=1.053710 - 0.14142\omega$ |

**Table S5.** Estimation of the atmospheric transmittance for TIRS for the water vapor content range of 0.5~3 g·cm<sup>-2</sup>.

| Profiles            | Estimation Equation             |
|---------------------|---------------------------------|
| 1976US Standard     | $\tau= - 0.1146\omega + 1.0286$ |
| Mid-Latitude Summer | $\tau= - 0.1134\omega + 1.0335$ |

The atmospheric water vapor content can be can be obtained by the conversion of water vapor pressure (Yang and Qiu, 1996):

$$\omega=0.0981e+0.1697 \quad (S8)$$

where e is the water vapor pressure and can be calculated by Equation S9:

$$e = 0.6108 \times \exp\left(\frac{17.27(T_0 - 273)}{237.3 + T_0 - 273}\right) \times RH \times 10 \quad (S9)$$

where T<sub>0</sub> is the air temperature near the surface (K) and RH is the relative humidity (%), which was acquired from meteorological station.

#### Estimation of average atmospheric temperature (T<sub>a</sub>)

According to the method provided by Qin et al. (2003), the average atmospheric temperature (K) can be estimated by the equations listed in Table S6 . The equation for mid-latitude summer was selected in this research.

**Table S6.** Equations for estimating the average atmospheric temperature.

| Standard atmosphere | Equation                 |
|---------------------|--------------------------|
| USA 1976            | $T_a=25.9396+0.88045T_0$ |
| Tropical            | $T_a=17.9769+0.91715T_0$ |
| Mid-latitude summer | $T_a=16.0110+0.92621T_0$ |
| Mid-latitude winder | $T_a=19.2704+0.91118T_0$ |

**Table S7.** Year matching between distribution maps of LST and LCZ.

| LCZ  | LST  | LCZ  | LST  |
|------|------|------|------|
| 2003 | 2000 | 2010 | 2009 |

|      |      |      |      |
|------|------|------|------|
| 2005 | 2001 | 2017 | 2010 |
|      | 2002 |      | 2011 |
|      | 2003 |      | 2012 |
|      | 2004 |      | 2013 |
|      | 2005 |      | 2014 |
|      | 2006 |      | 2015 |
|      | 2007 |      | 2016 |
| 2010 | 2008 |      | 2017 |

**Table S8.** Lowest, highest and mean LST (°C) for each LST distribution map.

| Year | Lowest | Highest | Mean |
|------|--------|---------|------|
| 2000 | 6.0    | 57.8    | 29.9 |
| 2001 | 14.9   | 55.4    | 34.5 |
| 2002 | 4.5    | 52.9    | 28.6 |
| 2003 | 6.6    | 62.4    | 35.2 |
| 2004 | 23.1   | 56.0    | 36.3 |
| 2005 | 24.0   | 53.8    | 35.9 |
| 2006 | 12.4   | 58.6    | 33.1 |
| 2007 | 12.4   | 59.5    | 34.0 |
| 2008 | 18.6   | 53.3    | 33.0 |
| 2009 | 10.7   | 55.6    | 33.6 |
| 2010 | 15.5   | 51.4    | 32.7 |
| 2011 | 7.9    | 58.6    | 35.6 |
| 2012 | 13.2   | 55.3    | 32.1 |
| 2013 | 5.0    | 51.5    | 29.1 |
| 2014 | 16.8   | 54.1    | 34.2 |
| 2015 | 18.7   | 48.2    | 33.0 |
| 2016 | 16.8   | 55.2    | 33.7 |
| 2017 | 20.3   | 64.5    | 42.0 |

**Table S9.** Confusion matrix of LCZ classification of 2003.

| Clas<br>s | LCZ 1 | LCZ 2 | LCZ 3 | LCZ 4 | LCZ 5 | LCZ 8 | LCZ A | LCZ B | LCZ D | LCZ E | LCZ F | LCZ G | SumUser | UA(%) |
|-----------|-------|-------|-------|-------|-------|-------|-------|-------|-------|-------|-------|-------|---------|-------|
| LCZ 1     | 80    | 1     | 1     | 12    | 1     | 1     | 0     | 0     | 0     | 6     | 1     | 0     | 103     | 77.7  |
| LCZ 2     | 9     | 69    | 14    | 0     | 1     | 1     | 0     | 0     | 0     | 2     | 0     | 0     | 96      | 71.9  |
| LCZ 3     | 4     | 25    | 178   | 8     | 9     | 0     | 0     | 0     | 0     | 0     | 14    | 0     | 238     | 74.8  |
| LCZ 4     | 30    | 6     | 15    | 212   | 17    | 7     | 3     | 6     | 1     | 18    | 14    | 0     | 329     | 64.4  |
| LCZ 5     | 3     | 22    | 16    | 33    | 244   | 20    | 0     | 7     | 0     | 8     | 4     | 0     | 357     | 68.3  |
| LCZ 8     | 0     | 0     | 0     | 1     | 0     | 144   | 0     | 1     | 0     | 10    | 0     | 0     | 156     | 92.3  |
| LCZ A     | 0     | 0     | 0     | 0     | 0     | 0     | 172   | 2     | 8     | 0     | 1     | 0     | 183     | 94.0  |
| LCZ B     | 0     | 0     | 0     | 2     | 5     | 1     | 28    | 285   | 31    | 4     | 2     | 2     | 360     | 79.2  |
| LCZ D     | 0     | 0     | 0     | 0     | 0     | 0     | 4     | 0     | 243   | 0     | 1     | 0     | 248     | 98.0  |

|          |      |      |      |      |      |      |      |      |      |      |      |      |              |       |
|----------|------|------|------|------|------|------|------|------|------|------|------|------|--------------|-------|
| LCZ E    | 10   | 5    | 2    | 10   | 4    | 8    | 0    | 1    | 0    | 135  | 5    | 0    | 180          | 75.0  |
| LCZ F    | 0    | 0    | 0    | 3    | 3    | 1    | 0    | 5    | 20   | 0    | 178  | 0    | 210          | 84.8  |
| LCZ G    | 0    | 0    | 0    | 0    | 0    | 0    | 2    | 0    | 0    | 0    | 5    | 261  | 268          | 97.4  |
| $\Sigma$ | 136  | 128  | 226  | 281  | 284  | 183  | 209  | 307  | 303  | 183  | 225  | 263  | <b>Kappa</b> | 0.787 |
| PA(%)    | 58.8 | 53.9 | 78.8 | 75.4 | 85.9 | 78.7 | 82.3 | 92.8 | 80.2 | 73.8 | 79.1 | 99.2 | <b>OA</b>    | 0.807 |

Notes:

UA refers to user's accuracy.

PA refers to producer's accuracy.

OA refers to overall accuracy.

**Table S10.** Confusion matrix of LCZ classification of 2005.

| <b>Clas</b> | LCZ 1 | LCZ 2 | LCZ 3 | LCZ 4 | LCZ 5 | LCZ 8 | LCZ A | LCZ B | LCZ D | LCZ E | LCZ F | LCZ G | SumUser      | UA(%) |
|-------------|-------|-------|-------|-------|-------|-------|-------|-------|-------|-------|-------|-------|--------------|-------|
| <b>s</b>    |       |       |       |       |       |       |       |       |       |       |       |       |              |       |
| LCZ 1       | 28    | 0     | 0     | 13    | 0     | 0     | 0     | 0     | 0     | 2     | 0     | 0     | 43           | 65.1  |
| LCZ 2       | 0     | 0     | 0     | 0     | 0     | 0     | 164   | 0     | 80    | 0     | 0     | 7     | 251          | 65.3  |
| LCZ 3       | 0     | 0     | 0     | 0     | 0     | 0     | 15    | 173   | 83    | 0     | 0     | 1     | 272          | 63.6  |
| LCZ 4       | 0     | 0     | 0     | 0     | 0     | 0     | 4     | 1     | 182   | 0     | 0     | 0     | 187          | 97.3  |
| LCZ 5       | 0     | 0     | 78    | 2     | 5     | 24    | 0     | 0     | 0     | 138   | 63    | 0     | 310          | 44.5  |
| LCZ 8       | 0     | 0     | 10    | 0     | 0     | 2     | 0     | 0     | 0     | 0     | 132   | 0     | 144          | 91.7  |
| LCZ A       | 2     | 0     | 0     | 0     | 0     | 0     | 1     | 0     | 0     | 0     | 0     | 272   | 275          | 98.9  |
| LCZ B       | 3     | 56    | 17    | 0     | 5     | 3     | 0     | 0     | 0     | 20    | 6     | 0     | 110          | 50.9  |
| LCZ D       | 0     | 4     | 69    | 0     | 4     | 1     | 0     | 0     | 0     | 8     | 1     | 0     | 87           | 79.3  |
| LCZ E       | 4     | 2     | 1     | 237   | 10    | 2     | 0     | 5     | 0     | 7     | 1     | 0     | 269          | 88.1  |
| LCZ F       | 3     | 11    | 36    | 10    | 242   | 0     | 0     | 0     | 0     | 28    | 21    | 0     | 351          | 68.9  |
| LCZ G       | 1     | 0     | 3     | 0     | 0     | 217   | 0     | 0     | 0     | 0     | 31    | 0     | 252          | 86.1  |
| $\Sigma$    | 41    | 73    | 214   | 262   | 266   | 249   | 184   | 179   | 345   | 203   | 255   | 280   | <b>Kappa</b> | 0.724 |
| PA(%)       | 68.3  | 76.7  | 32.2  | 90.5  | 91.0  | 87.1  | 89.1  | 96.6  | 52.8  | 68.0  | 51.8  | 97.1  | <b>OA</b>    | 0.749 |

Notes:

UA refers to user's accuracy.

PA refers to producer's accuracy.

OA refers to overall accuracy.

**Table S11.** Confusion matrix of LCZ classification of 2010.

| <b>Clas</b> | LCZ 1 | LCZ 2 | LCZ 3 | LCZ 4 | LCZ 5 | LCZ 8 | LCZ A | LCZ B | LCZ D | LCZ E | LCZ F | LCZ G | SumUser | UA(%) |
|-------------|-------|-------|-------|-------|-------|-------|-------|-------|-------|-------|-------|-------|---------|-------|
| <b>s</b>    |       |       |       |       |       |       |       |       |       |       |       |       |         |       |
| LCZ 1       | 161   | 1     | 22    | 28    | 11    | 0     | 0     | 0     | 0     | 5     | 1     | 14    | 243     | 66.3  |
| LCZ 2       | 8     | 64    | 44    | 1     | 15    | 10    | 0     | 2     | 0     | 17    | 0     | 0     | 161     | 39.8  |
| LCZ 3       | 3     | 9     | 232   | 5     | 34    | 4     | 1     | 0     | 0     | 9     | 1     | 0     | 298     | 77.9  |
| LCZ 4       | 24    | 0     | 11    | 359   | 80    | 0     | 5     | 3     | 0     | 2     | 1     | 10    | 495     | 72.5  |
| LCZ 5       | 4     | 3     | 136   | 44    | 344   | 1     | 2     | 7     | 0     | 4     | 4     | 2     | 551     | 62.4  |
| LCZ 8       | 2     | 9     | 134   | 0     | 2     | 658   | 0     | 0     | 3     | 44    | 2     | 1     | 855     | 77.0  |
| LCZ A       | 0     | 0     | 1     | 0     | 4     | 0     | 218   | 29    | 62    | 0     | 0     | 19    | 333     | 65.5  |
| LCZ B       | 0     | 0     | 2     | 4     | 9     | 0     | 22    | 63    | 31    | 1     | 1     | 3     | 136     | 46.3  |

|          |      |      |      |      |      |      |      |      |      |      |      |      |              |       |
|----------|------|------|------|------|------|------|------|------|------|------|------|------|--------------|-------|
| LCZ D    | 0    | 1    | 2    | 0    | 0    | 1    | 1    | 15   | 393  | 0    | 2    | 0    | 415          | 94.7  |
| LCZ E    | 3    | 5    | 69   | 1    | 11   | 5    | 0    | 0    | 0    | 215  | 5    | 9    | 323          | 66.6  |
| LCZ F    | 0    | 7    | 6    | 8    | 0    | 5    | 0    | 5    | 0    | 30   | 209  | 3    | 273          | 76.6  |
| LCZ G    | 0    | 0    | 0    | 0    | 0    | 0    | 4    | 0    | 2    | 0    | 0    | 339  | 345          | 98.3  |
| $\Sigma$ | 205  | 99   | 659  | 450  | 510  | 684  | 253  | 124  | 491  | 327  | 226  | 400  | <b>Kappa</b> | 0.706 |
| PA(%)    | 78.5 | 64.6 | 35.2 | 79.8 | 67.4 | 96.2 | 86.2 | 50.8 | 80.0 | 65.7 | 92.5 | 84.8 | <b>OA</b>    | 0.735 |

Notes:

UA refers to user's accuracy.

PA refers to producer's accuracy.

OA refers to overall accuracy.

**Table S12.** Confusion matrix of LCZ classification of 2017.

| <b>Clas<br/>s</b> | LCZ 1 | LCZ 2 | LCZ 3 | LCZ 4 | LCZ 5 | LCZ 8 | LCZ A | LCZ B | LCZ D | LCZ E | LCZ F | LCZ G | SumUser      | UA(%) |
|-------------------|-------|-------|-------|-------|-------|-------|-------|-------|-------|-------|-------|-------|--------------|-------|
| LCZ 1             | 138   | 15    | 0     | 35    | 10    | 3     | 0     | 0     | 1     | 3     | 6     | 0     | 211          | 65.4  |
| LCZ 2             | 20    | 129   | 6     | 21    | 3     | 14    | 0     | 0     | 0     | 13    | 14    | 0     | 220          | 58.6  |
| LCZ 3             | 2     | 3     | 496   | 11    | 23    | 27    | 1     | 0     | 0     | 0     | 4     | 2     | 569          | 87.2  |
| LCZ 4             | 41    | 4     | 1     | 535   | 11    | 1     | 3     | 9     | 7     | 3     | 23    | 2     | 640          | 83.6  |
| LCZ 5             | 19    | 2     | 84    | 164   | 456   | 14    | 3     | 2     | 0     | 4     | 1     | 3     | 752          | 60.6  |
| LCZ 8             | 1     | 8     | 12    | 2     | 3     | 362   | 0     | 0     | 0     | 13    | 5     | 1     | 407          | 88.9  |
| LCZ A             | 3     | 0     | 0     | 20    | 1     | 1     | 297   | 20    | 41    | 0     | 0     | 0     | 383          | 77.5  |
| LCZ B             | 2     | 0     | 0     | 15    | 1     | 0     | 23    | 152   | 54    | 0     | 1     | 0     | 248          | 61.3  |
| LCZ D             | 0     | 0     | 0     | 16    | 0     | 6     | 8     | 25    | 306   | 3     | 9     | 0     | 373          | 82.0  |
| LCZ E             | 9     | 18    | 24    | 9     | 13    | 26    | 0     | 0     | 3     | 263   | 15    | 0     | 380          | 69.2  |
| LCZ F             | 2     | 1     | 4     | 12    | 1     | 10    | 0     | 2     | 6     | 14    | 160   | 0     | 212          | 75.5  |
| LCZ G             | 0     | 0     | 0     | 2     | 0     | 0     | 4     | 0     | 0     | 0     | 0     | 453   | 459          | 98.7  |
| $\Sigma$          | 237   | 180   | 627   | 842   | 522   | 464   | 339   | 210   | 418   | 316   | 238   | 461   | <b>Kappa</b> | 0.747 |
| PA(%)             | 58.2  | 71.7  | 79.1  | 63.5  | 87.4  | 78.0  | 87.6  | 72.4  | 73.2  | 83.2  | 67.2  | 98.3  | <b>OA</b>    | 0.772 |

Notes:

UA refers to user's accuracy.

PA refers to producer's accuracy.

OA refers to overall accuracy.

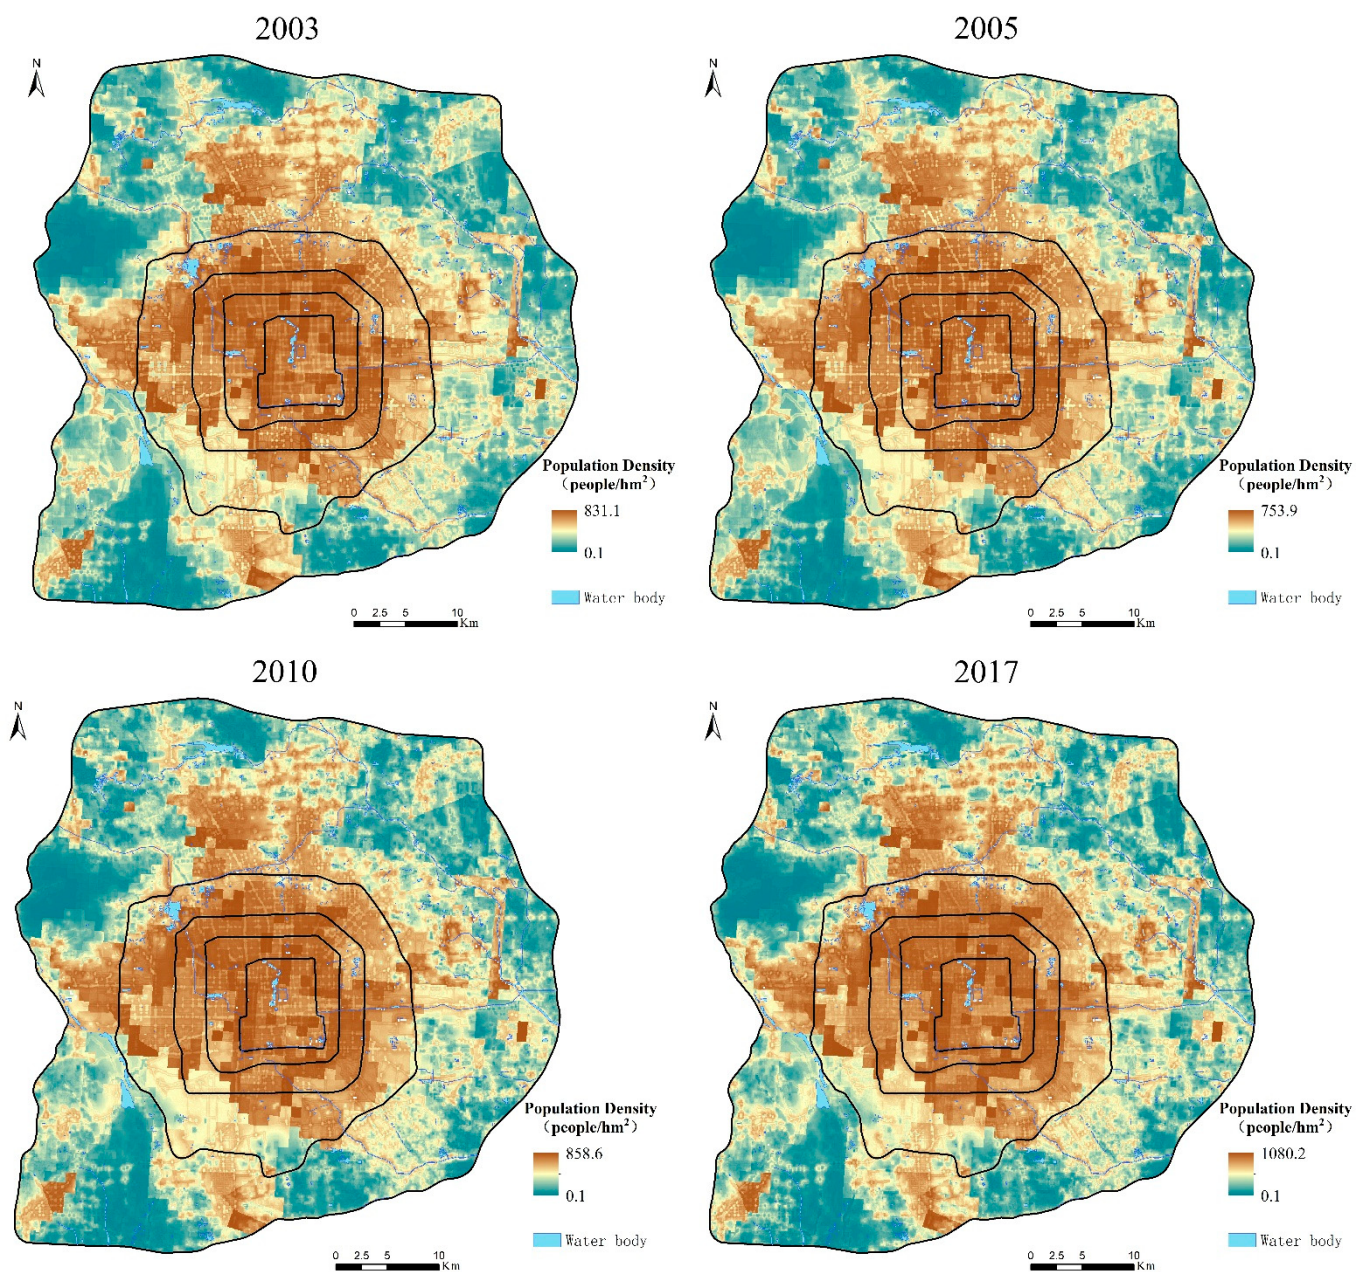

**Figure S1.** Population density distribution maps of 2003, 2005, 2010, and 2017

## Reference

- Carlson, T.N., Ripley, D.A., 1997. On the relation between NDVI, fractional vegetation cover, and leaf area index. *Remote Sens Environ* 62, 241-252.
- Qin, Z., Li, W., Xu, B., Chen, Z., Liu, J., 2004. The estimation of land surface emissivity for Landsat TM6. *Remote Sensing for Land & Resources* 16, 28-32, 36, 41.
- Qin, Z., Li, W., Zhang, M., Karnieli, A., Berliner, P., 2003. Estimating of the essential atmospheric parameters of mono-window algorithm for land surface temperature retrieval from Landsat TM 6. *Remote Sensing for Land & Resources* 15, 37-43.
- Rozenstein, O., Qin, Z.H., Derimian, Y., Karnieli, A., 2014. Derivation of Land Surface Temperature for Landsat-8 TIRS Using a Split Window Algorithm (vol 14, pg 5768, 2014). *Sensors-Basel* 14, 11277-11277.
- Sobrino, J.A., Jimenez-Munoz, J.C., Paolini, L., 2004. Land surface temperature retrieval from LANDSAT TM 5. *Remote Sens Environ* 90, 434-440.
- Song, T., Duan, Z., Liu, J., Shi, J., Yan, F., Sheng, S., Huang, J., Wu, W., 2015. Comparison of four algorithms to retrieve land surface temperature using Landsat 8 satellite. *Yaogan Xuebao/Journal of Remote Sensing* 19, 451-464.
- Stewart, I.D., Oke, T.R., 2012. Local Climate Zones for Urban Temperature Studies. *B Am Meteorol Soc* 93, 1879-1900.
- Yang, J., Qiu, J., 1996. The Empirical Expressions of the Relation between Precipitable Water and Ground Water Vapor Pressure for Some Areas in China. *Scientia Atmospherica Sinica* 5, 620-626.
